# Supplementary material
Source: publisher site journal article supplement (https://www.dovepress.com/article/277325)
Supplement: Supplementary file 1 [file get_supplementary_file.php]

## **Online supplementary material**

**eTable 1.** Definitions and prevalence of DANCAMI candidate diseases and their individual effect on 1-year mortality in the Danish myocardial infarction cohort (n=36,685)

| Variables | ICD-10 codes | Prevalence  N (%) | Univariate HR*  (95% CI) |
| --- | --- | --- | --- |
| Cardiovascular diseases |  |  |  |
| Myocardial infarction (index disease) | I21 | 36,685 (100) |  |
| Stable angina pectoris | I20.1, I20.8, I20.9, I25.1, I25.9 | 6,852 (19) | 0.90 (0.85–0.95) |
| Heart failure | I50, I11.0, I13.0, I13.2 | 1,603 (4.4) | 1.79 (1.67–1.92) |
| Cardiomyopathy | I25.5, I42, I43 | 405 (1.1) | 1.38 (1.16–1.65) |
| Intermittent arterial claudication | I73.9 | 841 (2.3) | 1.59 (1.43–1.77) |
| Aortic disease | I71 | 458 (1.3) | 1.43 (1.22–1.68) |
| Deep vein thrombosis in the lower limb | I80.1-I80.3 | 289 (0.8) | 1.15 (0.93–1.41) |
| Pulmonary embolism | I26.0, I26.9 | 186 (0.5) | 1.26 (0.99–1.60) |
| Atrial fibrillation/flutter | I48 | 2,784 (7.6) | 1.32 (1.24–1.40) |
| Heart block (atrioventricular block, left bundle-branch block, fascicular block) | 144, I45 | 422 (1.2) | 1.15 (0.99–1.34) |
| Ventricular tachycardia | I47.2 | 79 (0.2) | 1.93 (1.39–2.69) |
| Valvular heart disease | I05–I09, I34–I39 | 1,336 (3.6) | 1.54 (1.43–1.67) |
| Stroke | I60, I61, I63, I64 | 1,048 (3.8) | 1.59 (1.47–1.72) |
| Hypertension | I10–I13, I15, I67.4† | 19,389 (53) | 1.35 (1.29–1.41) |
| Cancer |  |  |  |
| High-risk cancer | C13, C15, C16, C22–C26, C33, C34, C45, C77–C79, C92.0, C92.3–C92.9, C95 | 631 (1.7) | 3.41 (3.09–3.77) |
| Low-risk cancer | C00–C12, C14, C17–C21, C30–C32, C37–C44, C46–C76, C80–C91, C92.1, C93, C94, C96, C97 | 2,270 (6.2) | 1.47 (1.37–1.57) |
| Hematologic disease | | |  |
| Nutritional anemia | D50–D53 | 607 (1.7) | 1.21 (1.07–1.37) |
| Coagulopathy | D55–D61, D63, D64, D66–D72, D74–D77 | 1,783 (4.9) | 1.52 (1.42–1.63) |
| Immune system disorder | D80–D84, D89 | 15 (0.0) | 1.44 (0.65–3.21) |
| HIV | B21–B24 | 27 (0.1) | 0.51 (0.07–3.64) |
| Endocrine disease | |  |  |
| Diabetes uncomplicated | E10.0, E10.1, E10.9, E11.0, E11.1, E11.9 E12.0, E12.1, E12.9 E13.0, E13.1, E13.9 E14.0, E14.1, E14.9‡ | 3,141 (8.6) | 1.21 (1.14–1.30) |
| Diabetes with end-organ damage | E10.2–E10.8, E11.2–E11.8, E12.2–E12.8, E13.2–E13.8, E14.2–E14.8, H36.0 | 2,108 (5.8) | 1.67 (1.55–1.80) |
| Endocrine disorder (not diabetes) | E01–E03, E05, E06.2, E06.3, E06.5, E07, E20–27, E31, E32, E34.8, E34.9 | 1,096 (3.0) | 1.10 (0.99–1.23) |
| Obesity | E65–E68 | 621 (1.7) | 1.37 (1.16–1.62) |
| Psychiatric disease |  |  |  |
| Alcohol and drug abuse | F10–F19, Z50.2, Z50.3, Z71.4, Z71.5 | 672 (1.8) | 1.96 (1.69–2.29) |
| Schizophrenia | F20–F22, F25, F28, F29§ | 1,160 (3.2) | 1.92 (1.75–2.10) |
| Affective disorder | F30–F34, F38, F39|| | 4,766 (13) | 1.57 (1.49–1.65) |
| Anxiety and behavioral disorder | F40–F45, F48, F50, F55, F59–F66, F68, F69 | 156 (0.4) | 1.29 (0.92–1.81) |
| Neurologic disease |  |  |  |
| Dementia | F00–F03, F05.1, G30 | 459 (1.3) | 1.69 (1.50–1.91) |
| Transient ischemic attack | G45 | 859 (2.3) | 1.12 (1.00–1.26) |
| Epilepsy | G40, G41 | 334 (0.9) | 1.76 (1.48–2.10) |
| Neurodegenerative disorder | G10–G13, G20-23, G25.5, G31.2, G31.8, G31.9, G35–G37, G90, G93.4 | 348 (1.0) | 1.53 (1.29–1.80) |
| Hemiplegia | G81, G82 | 75 (0.2) | 2.13 (1.49–3.05) |
| Kidney disease |  |  |  |
| Chronic kidney disease | E10.2, E11.2, E14.2, I12, I13, N03, N05, N11.0, N14, N16, N18, N19, N26.9, Q61.1–Q61.4, Z99.2 | 1,576 (4.3) | 2.03 (1.86–2.22) |
| Pulmonary disease |  |  |  |
| Chronic pulmonary disease | J40–J47, J60–J67, J68.4, J70.1, J70.3, J84.1, J92.0, J96.1, J98.2, J98.3# | 8,015 (22) | 1.41 (1.35–1.48) |
| Gastrointestinal disease |  |  |  |
| Ulcer disease | K22.1, K25–K28 | 1,087 (3.0) | 1.47 (1.34–1.62) |
| Mild liver disease | B18, K70.1–K70.3, K70.9, K71, K73, K74, K76.0 | 209 (0.6) | 2.11 (1.66–2.70) |
| Moderate to severe liver disease | B15.0, B16.0, B16.2, B19.0, K70.4, K72, K76.6, I85 | 66 (0.2) | 2.96 (2.07–4.23) |
| Inflammatory bowel disease | K50, K51 | 275 (0.8) | 1.10 (0.87–1.38) |
| Chronic pancreatitis | K86.0, K86.1 | 71 (0.2) | 2.51 (1.68–3.75) |
| Rheumatic disease | |  | |
| Connective tissue disease | M05, M06, M08, M09, M30–M36, D86 | 1,153 (3.1) | 1.21 (1.09–1.34) |
| Bone disorder | M80–M83, M85, M86.3–M86.6, M88 | 1,428 (3.9) | 1.19 (1.10–1.31) |

***Abbreviations****: CI, confidence interval; HR, Hazard ratio*

* *Estimated with a Cox regression model adjusted for sex and age*

† *Or prescription for combination antihypertensive tablets (ATC code: C02DE52, C02LM01*–*C02LM08, C02LM12, C07BA06, C07CA03, C07CB03, C07CB03, C07FB02, C08CA55, C08DA51, C09BA, C09BB, C09DA, C09DB) or at least prescriptions for two different antihypertensive drugs (ATC code: C02DF01, C02EA, C02EX01, C03, C07, C08, C09AA, C09CA)*

‡ *Or HbA1c>48 mmol/L (only in the Danish cohort) or prescription for antidiabetic drugs (A10A, A10B)*

§*Or prescription for antipsychotic drugs (ATC code: N05A)*

||*Or prescription for antidepressive drugs (ATC code: N06A, except N06AX12)*

#*Or prescription for chronic pulmonary disease drugs (ATC code: R03)*

**eTable 2.** Continuous Net Reclassification Improvement with upward and downward reclassification of cases and controls of the continuous and categorical DANCAMI scores and other comorbidity indices in the Danish (development) and New Zealand (validation) cohorts of patients with first-time myocardial infarction.

|  | Continuous DANCAMI score | | | Categorical DANCAMI score | |
| --- | --- | --- | --- | --- | --- |
|  | Danish cohort | | New Zealand cohort | Danish cohort | New Zealand cohort |
| NRI | |  |  |  |  |
| Baseline* vs. DANCAMI† | | **0.52** | **0.68** | **0.55** | **0.72** |
| Cases, upward‡ | | 49% | 56% | 52% | 67% |
| Cases, downward‡ | | 51% | 44% | 49% | 33% |
| Controls, upward‡ | | 23% | 22% | 24% | 31% |
| Controls, downward‡ | | 77% | 78% | 76% | 69% |
| Baseline* vs. rDANCAMI† | | **0.43** | **0.57** | **0.41** | **0.53** |
| Cases, upward‡ | | 54% | 49% | 58% | 51% |
| Cases, downward‡ | | 46% | 51% | 42% | 49% |
| Controls, upward‡ | | 32% | 21% | 37% | 25% |
| Controls, downward‡ | | 68% | 79% | 63% | 75% |
| Baseline* vs. CCI† | | **0.41** | **0.58** | **0.46** | **0.71** |
| Cases, upward‡ | | 39% | 54% | 56% | 68% |
| Cases, downward‡ | | 61% | 46% | 44% | 32% |
| Controls, upward‡ | | 18% | 25% | 33% | 32% |
| Controls, downward‡ | | 82% | 75% | 67% | 68% |
| Baseline* vs. ECI† | | **0.40** | **0.68** | **0.47** | **0.69** |
| Cases, upward‡ | | 49% | 56% | 56% | 61% |
| Cases, downward‡ | | 51% | 44% | 44% | 39% |
| Controls, upward‡ | | 29% | 22% | 32% | 26% |
| Controls, downward‡ | | 71% | 78% | 68% | 74% |

***Abbreviations****: CCI, Charlson Comorbidity Index; DANCAMI, DANish Comorbidity index for Acute Myocardial Infarction; ECI, Elixhauser Comorbidity Index*

* *Baseline model defined as a Cox model including sex and age*

† *Model performances were examined in a Cox model including sex, age and individual model score/categories*

‡ *Cases/controls with either upward or downward reclassification*

**eTable 3.** Sensitivity analyses examining alternative hazard ratio threshold for inclusion in final models, precise beta-coefficients as score components, and hazard ratio instead of beta-coefficients as score components

|  | 1.20 HR threshold for inclusion (95% CI) | Precise beta coefficients  (95% CI) | HR instead of beta coefficients  (95% CI) |
| --- | --- | --- | --- |
| R2 |  |  |  |
| DANCAMI* | 0.33 (0.32–0.34) | 0.33 (0.32–.34) | 0.33 (0.32–0.34) |
| rDANCAMI* | 0.32 (0.31–0.33) | 0.32 (0.31–0.33) | 0.31 (0.30–0.32) |
| Harrell’s C |  |  |  |
| DANCAMI* | 0.75 (0.75–0.76) | 0.75 (0.75–0.76) | 0.75 (0.75–0.76) |
| rDANCAMI* | 0.75 (0.74–0.75) | 0.75 (0.74–0.75) | 0.75 (0.74–0.75) |
| IDI |  |  |  |
| Baseline† vs. DANCAMI* | 0.053 | 0.054 | 0.049 |
| Baseline† vs. rDANCAMI* | 0.038 | 0.039 | 0.035 |
| NRI |  |  |  |
| Baseline† vs. DANCAMI* | **0.51** | **0.51** | **0.50** |
| Cases, upward‡ | 48% | 49% | 55% |
| Cases, downward‡ | 52% | 51% | 45% |
| Controls, upward‡ | 23% | 24% | 30% |
| Controls, downward‡ | 77% | 76% | 70% |
| Baseline† vs. rDANCAMI* | **0.44** | **0.44** | **0.45** |
| Cases, upward‡ | 55% | 54% | 60% |
| Cases, downward‡ | 45% | 46% | 40% |
| Controls, upward‡ | 33% | 32% | 37% |
| Controls, downward‡ | 67% | 68% | 63% |

***Abbreviations****: CI, Confidence interval; DANCAMI, DANish Comorbidity index for Acute Myocardial Infarction; HR, Hazard ratio*

* *All model performances were examined in a Cox model including sex, age and individual model score*

† *Baseline model defined as a Cox model including sex and age*

‡ *Cases/controls with either upward or downward reclassification*

**eTable 4a.** Characteristics of the derivation (2000–2009) and the validation subcohorts (2010–2013) in the split-sample validation analysis

|  | Total Danish cohort  (2000-2013) | Derivation subcohort  (2000-2009) | Validation subcohort  (2010-2013) |
| --- | --- | --- | --- |
| Number of patients | 36,685 | 27,716 | 8,969 |
| Follow-up time, person years | 29,293 | 21,837 | 7456 |
| 1-year mortality, n (%) | 8,974 (24) | 7,118 (26) | 1,856 (21) |
| In-hospital mortality, n (%) | 5,104 (14) | 4,136 (15) | 968 (11) |
| Sex, n (%) |  |  |  |
| Female | 14,255 (39) | 10,873 (39) | 3,382 (38) |
| Male | 22,430 (61) | 16,843 (61) | 5,587 (62) |
| Age, y, median years (IQR) | 72 (61–81) | 72 (61–81) | 71 (60–80) |
| Prevalent comorbidities (%) |  |  |  |
| Most prevalent | Hypertension (53) | Hypertension (52) | Hypertension (54) |
| Second most prevalent | Chronic pulmonary disease (22) | Chronic pulmonary disease (22) | Chronic pulmonary disease (23) |
| Third most prevalent | Stable angina pectoris (19) | Stable angina pectoris (19) | Stable angina pectoris (17) |
| DANCAMI score, n (%) |  |  |  |
| 0 | 10,725 (29) | 8,213 (30) | 2,512 (28) |
| 1-3 | 14,953 (41) | 11,343 (41) | 3,610 (40) |
| 4-5 | 4,184 (11) | 3,079 (11) | 1,105 (12) |
| ≥6 | 6,823 (19) | 5,081 (18) | 1,742 (19) |
| rDANCAMI score, n (%) |  |  |  |
| 0 | 20,775 (57) | 15,855 (57) | 4,920 (55) |
| 1-3 | 9,691 (26) | 7,267 (26) | 2,424 (27) |
| 4-5 | 1,913 (5.2) | 1,432 (5.2) | 481 (5.4) |
| ≥6 | 4,306 (12) | 3,162 (11) | 1,144 (13) |
| CCI score, n (%) |  |  |  |
| 0 | 21,893 (60) | 16,543 (60) | 5,350 (60) |
| 1 | 6,515 (18) | 5,019 (18) | 1,496 (17) |
| 2 | 4,232 (12) | 3,176 (11) | 1,056 (12) |
| ≥3 | 4,045 (11) | 2,978 (11) | 1,067 (12) |
| ECI score, n (%) |  |  |  |
| ≤0 | 22,705 (62) | 17,291 (62) | 5,414 (60) |
| 1-5 | 9,285 (25) | 6,927 (25) | 2,358 (26) |
| 6-13 | 3,923 (11) | 2,936 (11) | 987 (11) |
| ≥14 | 772 (2.1) | 562 (2.0) | 210 (2.3) |

***Abbreviations****: CCI, Charlson Comorbidity Index; DANCAMI, DANish Comorbidity index for Acute Myocardial Infarction; ECI, Elixhauser Comorbidity Index; IQR, Interquartile range*

**eTable 4b.** Performance of the refitted DANCAMI and rDANCAMI in the split-sample validation analysis

|  | Derivation cohort (95% CI) |
| --- | --- |
| R2 |  |
| Baseline* | 0.31 (0.29–0.34) |
| DANCAMI† | 0.37 (0.35–0.39) |
| rDANCAMI† | 0.35 (0.33–0.37) |
| CCI† | 0.36 (0.34–0.38) |
| ECI† | 0.35 (0.33–0.37) |
| Harrell’s C |  |
| Baseline* | 0.74 (0.73–0.75) |
| DANCAMI† | 0.77 (0.76–0.78) |
| rDANCAMI† | 0.76 (0.75–0.77) |
| CCI† | 0.77 (0.76–0.78) |
| ECI† | 0.76 (0.75–0.77) |
| IDI |  |
| Baseline* vs. DANCAMI† | 0.059 |
| Baseline* vs. rDANCAMI† | 0.036 |
| Baseline* vs. CCI† | 0.044 |
| Baseline* vs. ECI† | 0.034 |
| NRI |  |
| Baseline* vs. DANCAMI† | **0.59** |
| Cases, upward‡ | 51% |
| Cases, downward‡ | 49% |
| Controls, upward‡ | 22% |
| Controls, downward‡ | 78% |
| Baseline* vs. rDANCAMI† | **0.41** |
| Cases, upward‡ | 47% |
| Cases, downward‡ | 53% |
| Controls, upward‡ | 27% |
| Controls, downward‡ | 73% |
| Baseline* vs. CCI† | **0.48** |
| Cases, upward‡ | 43% |
| Cases, downward‡ | 57% |
| Controls, upward‡ | 19% |
| Controls, downward‡ | 81% |
| Baseline* vs. ECI† | **0.36** |
| Cases, upward‡ | 47% |
| Cases, downward‡ | 53% |
| Controls, upward‡ | 29% |
| Controls, downward‡ | 71% |

***Abbreviations****: CCI, Charlson Comorbidity Index; CI, Confidence interval; DANCAMI, DANish Comorbidity index for Acute Myocardial Infarction; ECI, Elixhauser Comorbidity Index*

* *Baseline model defined as a Cox model including sex and age*

† *All model performances were examined in a Cox model including sex, age and individual model score*

‡ *Cases/controls with either upward or downward reclassification*

**eTable 5.** Subgroup analyses of the Danish myocardial infarction cohort.

|  | Men  (95% CI) | Women  (95% CI) | MI patients age>75  (95% CI) | Patients surviving hospital admission  (95% CI) | Danish MI cohort  (95% CI) |
| --- | --- | --- | --- | --- | --- |
| R2 |  |  |  |  |  |
| Baseline* | 0.32 (0.30–0.33) | 0.20 (0.19–0.22) | 0.07 (0.06–0.07) | 0.36 (0.35–0.38) | 0.28 (0.27–0.29) |
| DANCAMI† | 0.38 (0.37–0.40) | 0.25 (0.24–0.26) | 0.12 (0.11–0.13) | 0.45 (0.44–0.46) | 0.33 (0.32–0.34) |
| rDANCAMI† | 0.37 (0.35–0.38) | 0.24 (0.22–0.25) | 0.10 (0.09–0.11) | 0.43 (0.42–0.45) | 0.32 (0.31–0.33) |
| CCI† | 0.36 (0.35–0.38) | 0.24 (0.22–0.25) | 0.10 (0.09–0.11) | 0.43 (0.41–0.44) | 0.32 (0.31–0.33) |
| ECI† | 0.35 (0.33–0.36) | 0.23 (0.21–0.24) | 0.09 (0.08–0.10) | 0.41 (0.39–0.42) | 0.31 (0.30–0.32) |
| Harrell’s C |  |  |  |  |  |
| Baseline* | 0.74 (0.73–0.75) | 0.69 (0.68–0.70) | 0.60 (0.59–0.60) | 0.76 (0.76–0.77) | 0.73 (0.72–0.73) |
| DANCAMI† | 0.77 (0.77–0.78) | 0.71 (0.71–0.72) | 0.63 (0.62–0.64) | 0.81 (0.80–0.81) | 0.75 (0.75–0.76) |
| rDANCAMI† | 0.76 (0.76–0.77) | 0.71 (0.70–0.71) | 0.62 (0.61–0.63) | 0.80 (0.79–0.80) | 0.75 (0.74–0.75) |
| CCI† | 0.76 (0.76–0.77) | 0.70 (0.70–0.71) | 0.62 (0.61–0.63) | 0.80 (0.79–0.81) | 0.74 (0.74–0.75) |
| ECI† | 0.76 (0.75–0.76) | 0.70 (0.69–0.71) | 0.62 (0.61–0.62) | 0.79 (0.78–0.80) | 0.74 (0.74–0.75) |
| IDI |  |  |  |  |  |
| Baseline* vs. DANCAMI† | 0.064 | 0.043 | 0.049 | 0.064 | 0.054 |
| Baseline* vs. rDANCAMI† | 0.047 | 0.030 | 0.031 | 0.046 | 0.038 |
| Baseline* vs. CCI† | 0.045 | 0.030 | 0.034 | 0.048 | 0.038 |
| Baseline* vs. ECI† | 0.032 | 0.025 | 0.026 | 0.035 | 0.029 |
| NRI |  |  |  |  |  |
| Baseline* vs. DANCAMI† | **0.55** | **0.48** | **0.39** | **0.64** | **0.52** |
| Cases, upward‡ | 50% | 52% | 50% | 52% | 49% |
| Cases, downward‡ | 50% | 48% | 50% | 48% | 51% |
| Controls, upward‡ | 23% | 28% | 30% | 20% | 23% |
| Controls, downward‡ | 77% | 72% | 70% | 80% | 77% |
| Baseline* vs. rDANCAMI† | **0.48** | **0.39** | **0.27** | **0.55** | **0.43** |
| Cases, upward‡ | 52% | 53% | 53% | 57% | 54% |
| Cases, downward‡ | 48% | 47% | 47% | 43% | 46% |
| Controls, upward‡ | 28% | 34% | 40% | 30% | 32% |
| Controls, downward‡ | 72% | 66% | 60% | 70% | 68% |
| Baseline* vs. CCI† | **0.44** | **0.43** | **0.34** | **0.54** | **0.41** |
| Cases, upward‡ | 44% | 45% | 46% | 44% | 39% |
| Cases, downward‡ | 56% | 55% | 54% | 56% | 61% |
| Controls, upward‡ | 22% | 24% | 29% | 17% | 18% |
| Controls, downward‡ | 78% | 76% | 71% | 83% | 82% |
| Baseline* vs. ECI† | **0.43** | **0.28** | **0.27** | **0.48** | **0.40** |
| Cases, upward‡ | 47% | 49% | 46% | 52% | 49% |
| Cases, downward‡ | 53% | 51% | 54% | 48% | 51% |
| Controls, upward‡ | 25% | 35% | 33% | 28% | 29% |
| Controls, downward‡ | 75% | 65% | 67% | 72% | 71% |

***Abbreviations****: CCI, Charlson Comorbidity Index; CI, Confidence interval; DANCAMI, DANish Comorbidity index for Acute Myocardial Infarction; ECI, Elixhauser Comorbidity Index; MI, Myocardial infarction*

* *Baseline model defined as a Cox model including sex and age*

† *All model performances were examined in a Cox model including sex, age and individual model score*

‡ *Cases/controls with either upward or downward reclassification*

**eTable 6.** Subgroup analyses of the New Zealand myocardial infarction cohort.

|  | Men  (95% CI) | Women  (95% CI) | MI patients age>75  (95% CI) | Patients surviving hospital admission  (95% CI) | New Zealand MI cohort  (95% CI) |
| --- | --- | --- | --- | --- | --- |
| R2 |  |  |  |  |  |
| Baseline* | 0.32 (0.31–0.33) | 0.22 (0.21–0.23) | 0.08 (0.07–0.09) | 0.34 (0.33–0.35) | 0.28 (0.28–0.29) |
| DANCAMI† | 0.42 (0.41–0.43) | 0.31 (0.30–0.32) | 0.18 (0.17–0.18) | 0.45 (0.44–0.46) | 0.37 (0.37–0.38) |
| rDANCAMI† | 0.41 (0.40–0.42) | 0.29 (0.28–0.30) | 0.16 (0.15–0.17) | 0.44 (0.43–0.45) | 0.36 (0.35–0.37) |
| CCI† | 0.41 (0.40–0.42) | 0.31 (0.30–0.32) | 0.17 (0.16–0.18) | 0.44 (0.43–0.45) | 0.37 (0.37–0.38) |
| ECI† | 0.42 (0.41–0.43) | 0.31 (0.30–0.32) | 0.17 (0.16–0.18) | 0.44 (0.43–0.45) | 0.38 (0.37–0.38) |
| Harrell’s C |  |  |  |  |  |
| Baseline* | 0.74 (0.74–0.75) | 0.69 (0.69–0.70) | 0.61 (0.60–0.61) | 0.75 (0.75–0.76) | 0.73 (0.72–0.73) |
| DANCAMI† | 0.79 (0.79–0.80) | 0.74 (0.73–0.74) | 0.66 (0.66–0.67) | 0.81 (0.81–0.82) | 0.77 (0.77–0.78) |
| rDANCAMI† | 0.78 (0.78–0.79) | 0.73 (0.73–0.74) | 0.65 (0.65–0.66) | 0.81 (0.80–0.81) | 0.77 (0.76–0.77) |
| CCI† | 0.79 (0.78–0.79) | 0.74 (0.74–0.75) | 0.66 (0.66–0.67) | 0.81 (0.80–0.81) | 0.77 (0.77–0.78) |
| ECI† | 0.79 (0.79–0.80) | 0.74 (0.74–0.75) | 0.66 (0.66–0.67) | 081 (0.80–0.81) | 0.77 (0.77–0.78) |
| IDI |  |  |  |  |  |
| Baseline* vs. DANCAMI† | 0.088 | 0.071 | 0.070 | 0.073 | 0.079 |
| Baseline* vs. rDANCAMI† | 0.078 | 0.058 | 0.058 | 0.065 | 0.068 |
| Baseline* vs. CCI† | 0.082 | 0.074 | 0.067 | 0.065 | 0.077 |
| Baseline* vs. ECI† | 0.091 | 0.072 | 0.067 | 0.067 | 0.081 |
| NRI |  |  |  |  |  |
| Baseline* vs. DANCAMI† | **0.72** | **0.59** | **0.50** | **0.73** | **0.68** |
| Cases, upward‡ | 57% | 55% | 54% | 58% | 56% |
| Cases, downward‡ | 43% | 45% | 46% | 42% | 44% |
| Controls, upward‡ | 21% | 25% | 29% | 22% | 22% |
| Controls, downward‡ | 79% | 75% | 71% | 78% | 78% |
| Baseline* vs. rDANCAMI† | **0.58** | **0.51** | **0.43** | **0.64** | **0.57** |
| Cases, upward‡ | 51% | 50% | 48% | 51% | 49% |
| Cases, downward‡ | 49% | 50% | 52% | 49% | 51% |
| Controls, upward‡ | 22% | 24% | 27% | 19% | 22% |
| Controls, downward‡ | 78% | 76% | 73% | 81% | 78% |
| Baseline* vs. CCI† | **0.66** | **0.60** | **0.50** | **0.60** | **0.58** |
| Cases, upward‡ | 57% | 50% | 54% | 54% | 54% |
| Cases, downward‡ | 43% | 50% | 56% | 46% | 46% |
| Controls, upward‡ | 24% | 20% | 28% | 24% | 25% |
| Controls, downward‡ | 76% | 80% | 72% | 76% | 75% |
| Baseline* vs. ECI† | **0.73** | **0.61** | **0.49** | **0.68** | **0.68** |
| Cases, upward‡ | 57% | 54% | 52% | 56% | 56% |
| Cases, downward‡ | 43% | 46% | 48% | 44% | 44% |
| Controls, upward‡ | 20% | 24% | 28% | 22% | 22% |
| Controls, downward‡ | 80% | 76% | 72% | 78% | 78% |

***Abbreviations****: CCI, Charlson Comorbidity Index; CI, Confidence interval; DANCAMI, DANish Comorbidity index for Acute Myocardial Infarction; ECI, Elixhauser Comorbidity Index; MI, Myocardial infarction*

* *Baseline model defined as a Cox model including sex and age*

† *All model performances were examined in a Cox model including sex, age and individual model score*

‡ *Cases/controls with either upward or downward reclassification*

**eTable 7.** Stratification on ethnicity in the New Zealand myocardial infarction cohort.

|  | European/Other (95% CI) | Maori  (95% CI) | Pacific  (95% CI) | Indian  (95% CI) | Chinese/Other Asian (95% CI) |
| --- | --- | --- | --- | --- | --- |
| R2 |  |  |  |  |  |
| Baseline* | 0.30 (0.29–0.31) | 0.23 (0.20–0.26) | 0.23 (0.19–0.27) | 0.35 (0.29–0.41) | 0.34 (0.25–0.44) |
| DANCAMI† | 0.39 (0.38–0.39) | 0.35 (0.32–0.37) | 0.34 (0.31–0.38) | 0.40 (0.34–0.45) | 0.39 (0.31–0.49) |
| rDANCAMI† | 0.38 (0.37–0.39) | 0.33 (0.30–0.36) | 0.31 (0.27–0.35) | 0.39 (0.33–0.45) | 0.38 (0.29–0.48) |
| CCI† | 0.38 (0.37–0.39) | 0.36 (0.34–0.39) | 0.34 (0.31–0.38) | 0.43 (0.37–0.49) | 0.38 (0.30–0.48) |
| ECI† | 0.38 (0.37–0.39) | 0.36 (0.34–0.39) | 0.37 (0.34–0.40) | 0.45 (0.39–0.50) | 0.42 (0.34–0.52) |
| Harrell’s C |  |  |  |  |  |
| Baseline* | 0.74 (0.73–0.74) | 0.69 (0.68–0.70) | 0.70 (0.68–0.72) | 0.75 (0.72–0.78) | 0.74 (0.69–0.79) |
| DANCAMI† | 0.78 (0.78–0.78) | 0.76 (0.75–0.77) | 0.76 (0.74–0.77) | 0.78 (0.75–0.81) | 0.77 (0.72–0.82) |
| rDANCAMI† | 0.78 (0.77–0.78) | 0.74 (0.73–0.76) | 0.74 (0.72–0.76) | 0.77 (0.74–0.80) | 0.77 (0.72–0.82) |
| CCI† | 0.78 (0.78–0.78) | 0.76 (0.75–0.78) | 0.75 (0.74–0.77) | 0.79 (0.76–0.81) | 0.77 (0.72–0.82) |
| ECI† | 0.78 (0.78–0.78) | 0.76 (0.75–0.78) | 0.77 (0.75–0.78) | 0.80 (0.77–0.82) | 0.78 (0.74–0.83) |
| IDI |  |  |  |  |  |
| Baseline* vs. DANCAMI† | 0.078 | 0.088 | 0.078 | 0.037 | 0.036 |
| Baseline* vs. rDANCAMI† | 0.069 | 0.071 | 0.057 | 0.031 | 0.031 |
| Baseline* vs. CCI† | 0.073 | 0.099 | 0.074 | 0.051 | 0.029 |
| Baseline* vs. ECI† | 0.076 | 0.102 | 0.095 | 0.077 | 0.050 |
| NRI |  |  |  |  |  |
| Baseline* vs. DANCAMI† | **0.69** | **0.73** | **0.64** | **0.57** | **0.55** |
| Cases, upward‡ | 56% | 61% | 61% | 55% | 51% |
| Cases, downward‡ | 44% | 39% | 39% | 45% | 49% |
| Controls, upward‡ | 21% | 25% | 29% | 26% | 23% |
| Controls, downward‡ | 79% | 75% | 71% | 74% | 77% |
| Baseline* vs. rDANCAMI† | **0.61** | **0.59** | **0.48** | **0.41** | **0.45** |
| Cases, upward‡ | 50% | 52% | 48% | 47% | 44% |
| Cases, downward‡ | 50% | 48% | 52% | 53% | 56% |
| Controls, upward‡ | 20% | 22% | 24% | 27% | 22% |
| Controls, downward‡ | 80% | 77% | 76% | 73% | 78% |
| Baseline* vs. CCI† | **0.61** | **0.73** | **0.62** | **0.60** | **0.42** |
| Cases, upward‡ | 55% | 61% | 59% | 59% | 46% |
| Cases, downward‡ | 45% | 39% | 51% | 41% | 54% |
| Controls, upward‡ | 24% | 24% | 28% | 29% | 25% |
| Controls, downward‡ | 76% | 76% | 72% | 71% | 75% |
| Baseline* vs. ECI† | **0.67** | **0.75** | **0.65** | **0.64** | **0.68** |
| Cases, upward‡ | 55% | 60% | 56% | 53% | 55% |
| Cases, downward‡ | 45% | 40% | 44% | 47% | 45% |
| Controls, upward‡ | 22% | 23% | 24% | 21% | 21% |
| Controls, downward‡ | 78% | 77% | 76% | 79% | 79% |

***Abbreviations****: CCI, Charlson Comorbidity Index; CI, Confidence interval; DANCAMI, DANish Comorbidity index for Acute Myocardial Infarction; ECI, Elixhauser Comorbidity Index*

* *Baseline model defined as a Cox model including sex and age*

† *All model performances were examined in a Cox model including sex, age and individual model score*

‡ *Cases/controls with either upward or downward reclassification*
